# Supplementary material for: Oriented perylene incorporated optically anisotropic 2D silica films
Source: Royal Society of Chemistry journal article supplement (doi:10.1039/c7ra05036d), 2017-01-01
Supplement: c7ra05036d1.pdf [file c7ra05036d1.pdf]

## Supporting Information

### **Oriented perylene incorporated optically anisotropic 2D silica films**

Deepa Sriramulu,<sup>a</sup> Shuvan Prashant Turaga,<sup>b</sup> Andrew Anthony Bettioli,<sup>b</sup> and Suresh Valiyaveetil<sup>a\*</sup>

<sup>a</sup>Materials Research Laboratory, Department of Chemistry,  
National University of Singapore, 3 Science Drive 3, Singapore 117543.

<sup>b</sup>Department of Physics, National University of Singapore,  
2 Science Drive 3, Singapore 117542

\*chmsv@nus.edu.sg

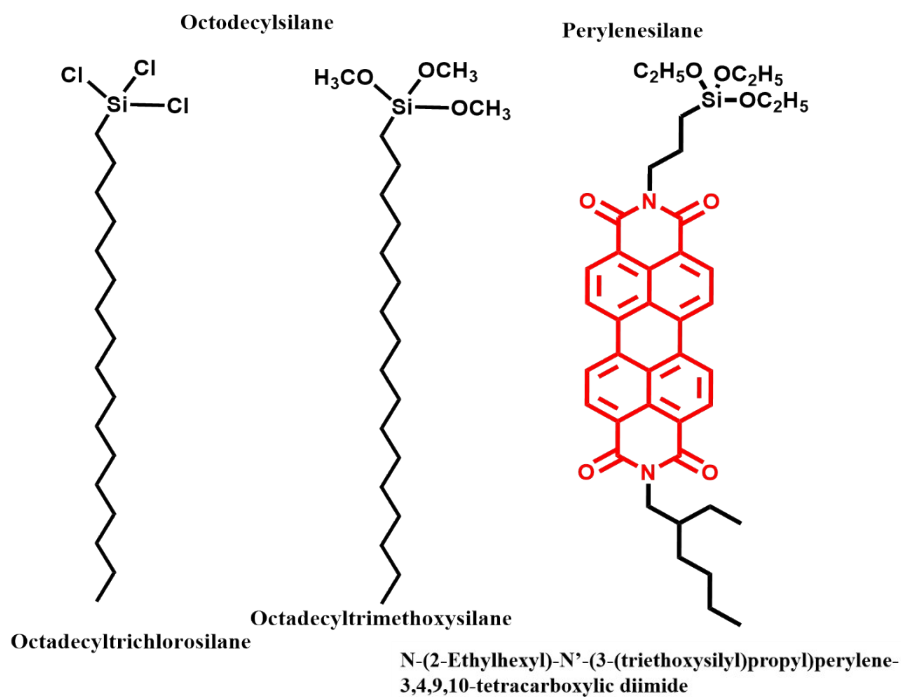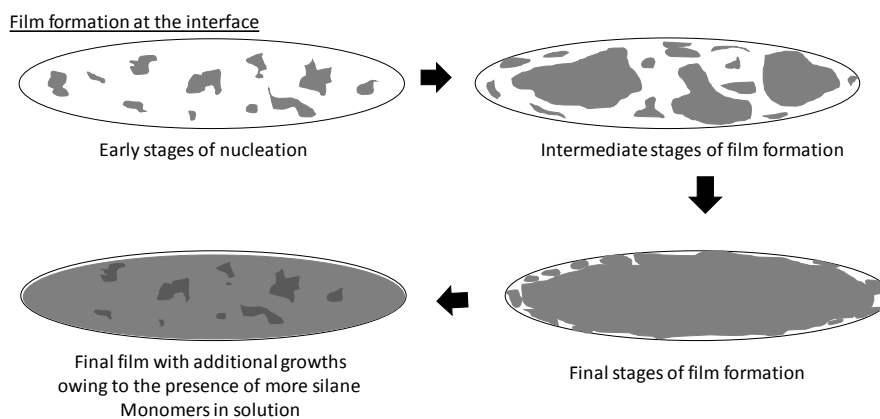

**Fig. S1** Molecular structure of precursors used for preparing silica films and a cartoonistic representation of film formation at the interface.

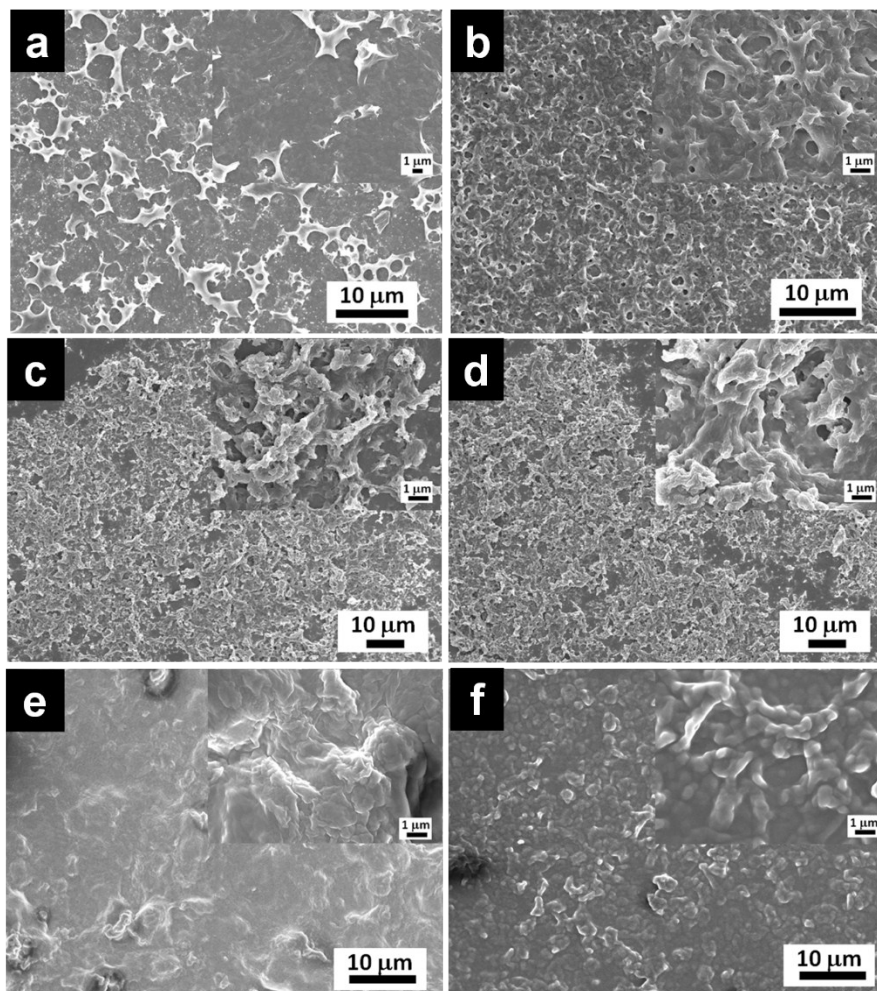

**Fig. S2** FESEM micrographs of silica film obtained from (a) **O-Si**, (b) **P-Si** and combination of perylenesilane and octadecylsilane in mole ratios of 1: 1 (c, **PO<sub>1</sub>-Si**), 1:10 (d, **PO<sub>10</sub>-Si**), 1:100 (e, **PO<sub>100</sub>-Si**) and 1:1000 (f, **PO<sub>1000</sub>-Si**) on the organic side.

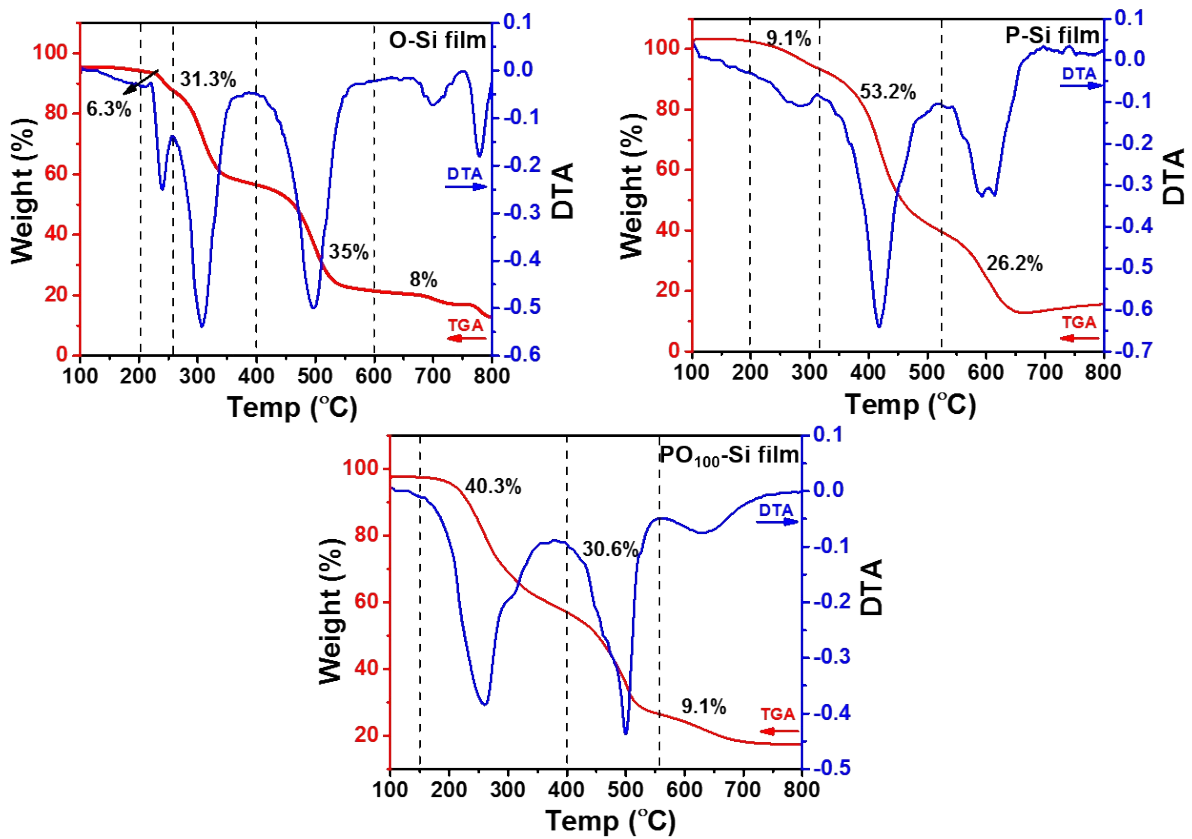

**Fig. S3** TGA-DTA analysis of **O-Si**, **P-Si** film and **PO<sub>100</sub>-Si** film using a heating rate of 10 °C/min in air.

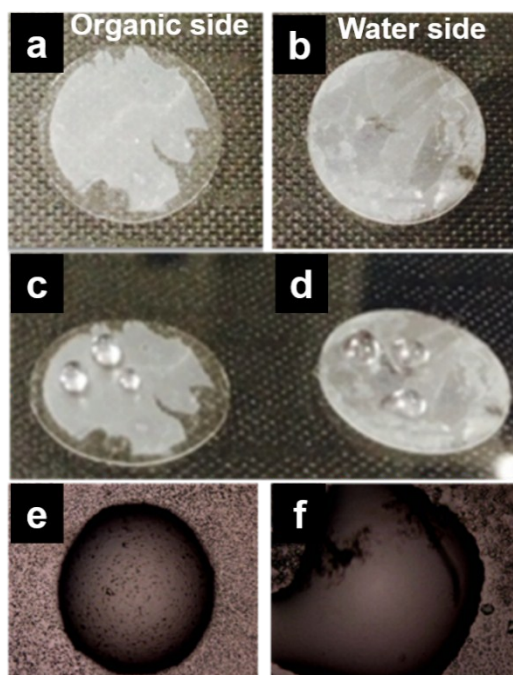

**Fig. S4** Digital photograph of **O-Si** film surface collected on a glass substrate facing organic side (a), facing water side (b), water drop on the surface of the film facing organic (c) and water side (d) and corresponding image of water drop on the surface of the film facing organic (e) and water side (f) under optical microscope.

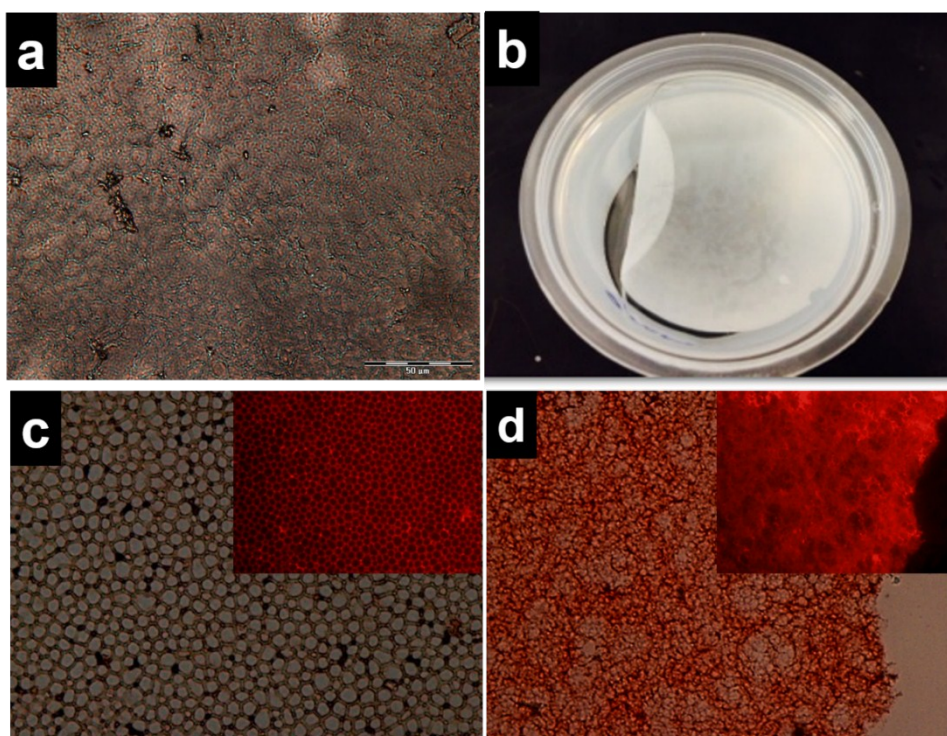

**Fig. S5** Optical images of **O-Si** film collected on coverslip (a) and image of **O-Si** film formed at liquid/liquid interface (b). Optical images of drop casted perylenesilane film on coverslip (c) and corresponding image of drop casted perylenesilane film (d).



and **P-Si** film formed at the interface of two liquids (**d**). (inset: corresponding fluorescent images under FITC filter)

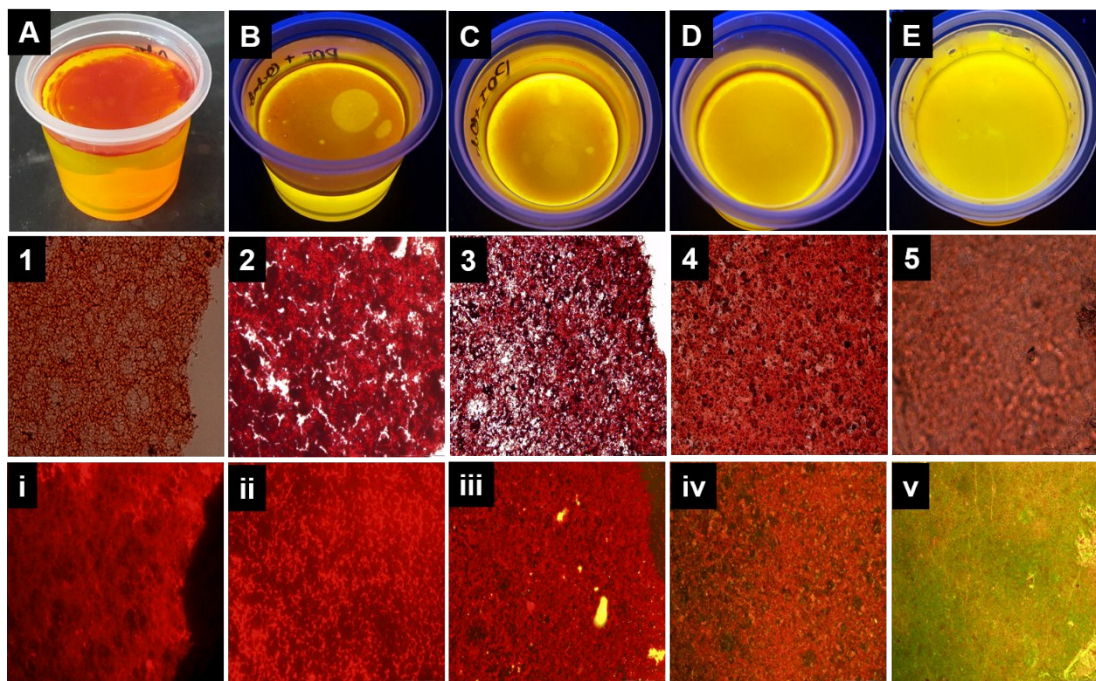

**Fig. S6** Images of films formation at the interface of two immiscible liquids (A) **P-Si** under normal light, (B) **PO<sub>1</sub>-Si**, (C) **PO<sub>10</sub>-Si**, (D) **PO<sub>100</sub>-Si** and (E) **PO<sub>1000</sub>-Si** when exposed to UV lamp ( $\lambda = 360$  nm), to show the effect of increase in concentration of Octadecylsilane on photophysical properties of the film formed at the interface. Optical micrographs of the films collected on coverslip in bright field mode (1) **P-Si**, (2) **PO<sub>1</sub>-Si**, (3) **PO<sub>10</sub>-Si**, (4) **PO<sub>100</sub>-Si** and (5) **PO<sub>1000</sub>-Si**. Fluorescent optical micrographs of the films under FITC mode (i) **P-Si**, (ii) **PO<sub>1</sub>-Si**, (iii) **PO<sub>10</sub>-Si**, (iv) **PO<sub>100</sub>-Si** and (v) **PO<sub>1000</sub>-Si**.
